# Supplementary material for: SIRT6 interacts with TRF2 and promotes its degradation in response to DNA damage
Source: PubMed Central journal article supplement — Nucleic Acids Res. 2016 Dec 6;45(4):1820–34. doi: 10.1093/nar/gkw1202 (PMC5389694; doi:10.1093/nar/gkw1202), 2016-12-06
Supplement: gkw1202_Supp.pdf [file gkw1202_Supp.pdf]

# Supplemental Figure 1

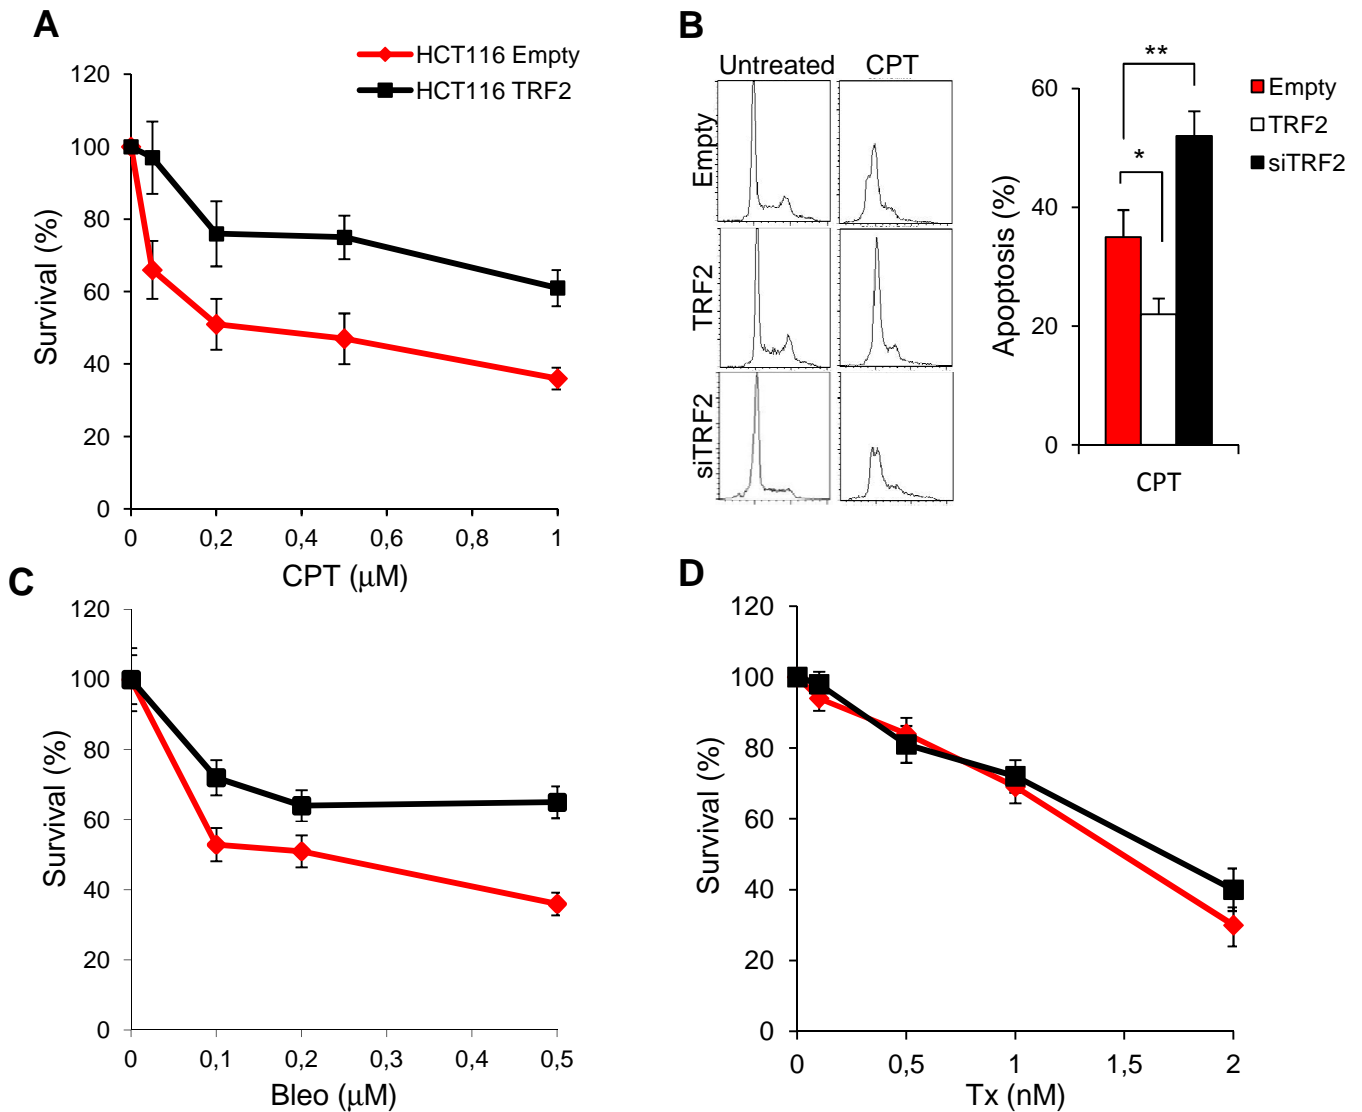

## Supplemental Figure 1. TRF2 overexpression confers resistance to CPT and Bleo exposure.

A) Survival curves of HCT116 cells infected with Myc-TRF2 or Empty retroviral vectors exposed for 2 hrs to the indicated doses of Camptothecin (CPT). B) Cell cycle analysis with PI staining of HCT116 cells transfected with the indicated constructs or with the siRNA for TRF2 untreated or treated with 0.2  $\mu\text{M}$  CPT. y axis, cell numbers; x axis, DNA content. The percentages of apoptosis reported in the bar graph were calculated by the ModFit LT software. C-D) Survival curves of HCT116 cell lines exposed to the indicated doses of Bleomycin (Bleo; C) and Taxol (Tx; D). The data represent the mean of three independent experiments  $\pm$  SD.

## Supplemental Figure 2

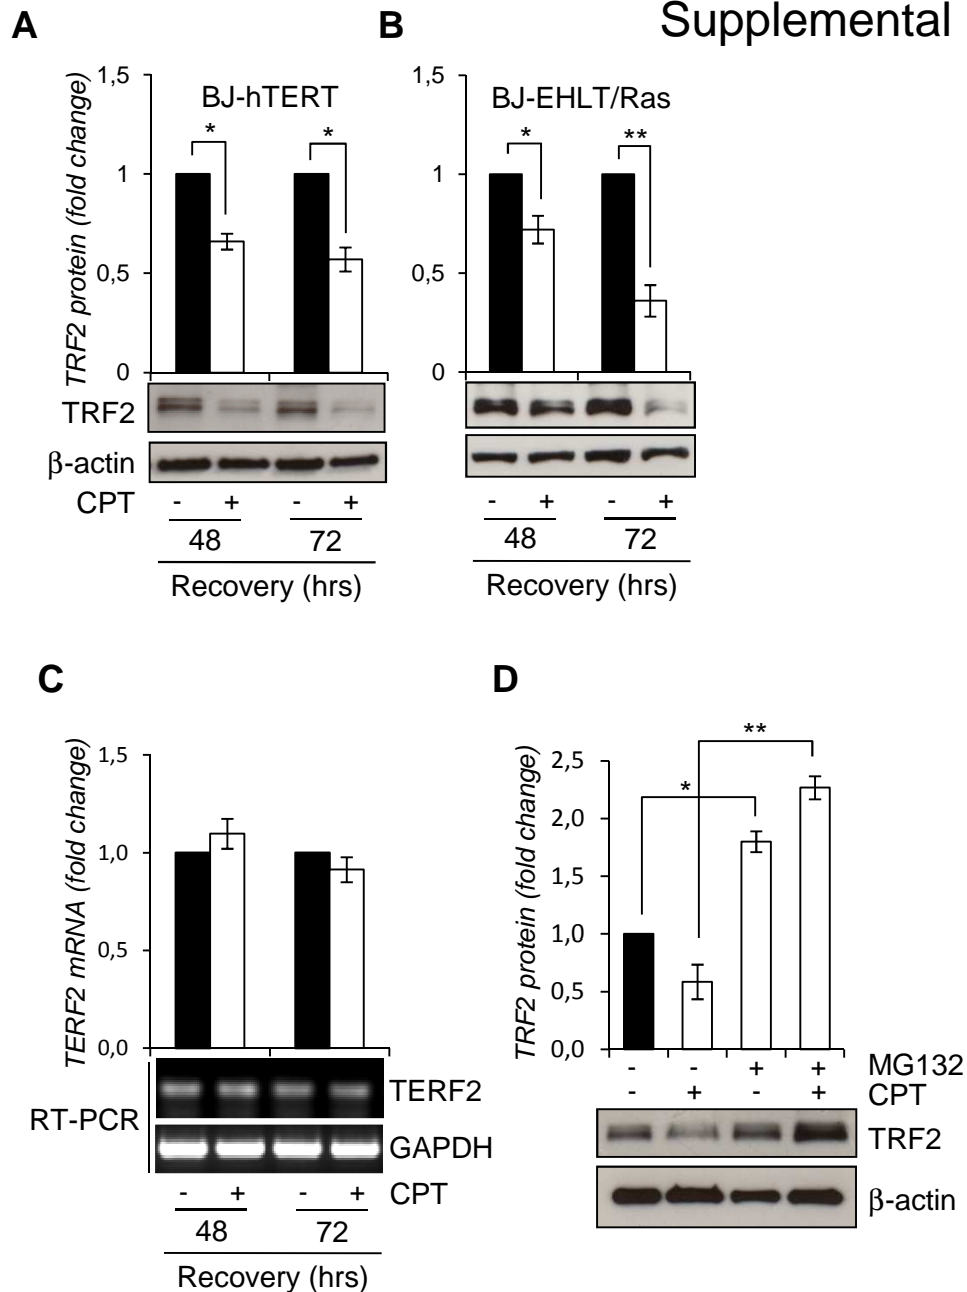

### Supplemental Figure 2. TRF2 is degraded upon CPT treatment through a proteasome-mediated p53-independent mechanism.

A-B) Expression levels of TRF2 were examined by western blot in BJ-hTERT (A) and BJ-EHLT/Ras (B) human fibroblasts treated with 0.2  $\mu$ M CPT for 2 hours and then processed for immunoblotting after 48 and 72 hours by the end of treatment. C) RT-PCR analysis of *TERF2* mRNA with the picture on the lower panel showing the amplification products run on agarose gel in HCT116 cells treated as the fibroblasts in A-B. D) HCT116 cells were exposed to 2  $\mu$ M CPT for 2 hours; at the end of treatment the medium was replaced in presence or not of the proteasome inhibitor MG132 (10  $\mu$ M) and after 6 hours the cells were processed for western blot analysis of the indicated proteins. All histograms show the TRF2 expression levels expressed as fold changes in treated versus untreated samples, after  $\beta$ -actin normalization. The mean values of three independent experiments are reported. Bars indicate means  $\pm$  SD. \* =  $p < 0.05$ ; \*\* =  $p < 0.01$ .

# Supplemental Figure 3

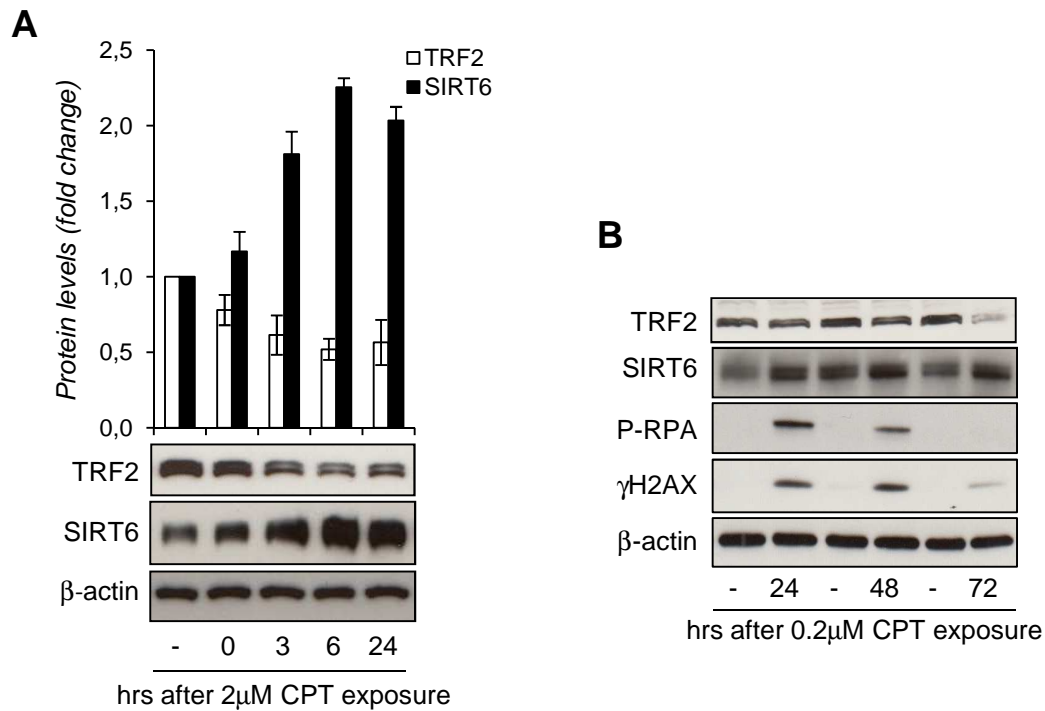

## Supplemental Figure 3. TRF2 is degraded upon CPT treatment while SIRT6 is increased.

Expression levels of indicated proteins were examined by western blot in HCT116 cells treated with 2µM (A) or 0.2µM (B) CPT for 2 hours and then processed at the indicated times by the end of treatment. In (A) the histograms show the TRF2 and SIRT6 expression levels reported as fold changes in treated versus untreated samples, after β-actin normalization. The mean values of three independent experiments are reported. Bars indicate means ± SD.

## Supplemental Figure 4

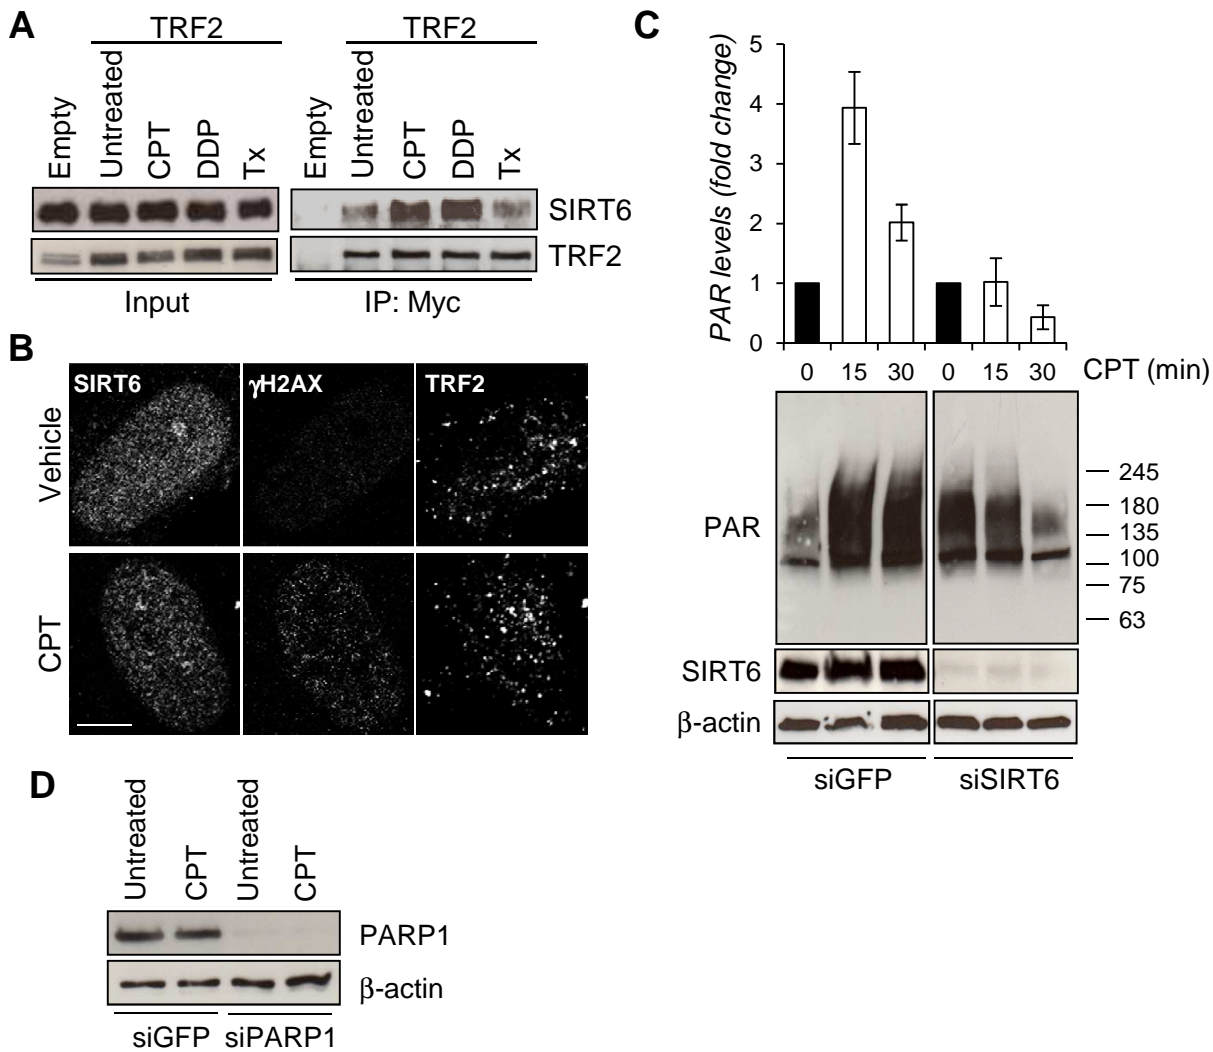

**Supplemental Figure 4. TRF2 and SIRT6 interaction is increased by DNA damage in a PARP-dependent manner.** A) Nuclear extracts of HCT116 cells infected with Myc-TRF2 or Empty retroviral vectors were immunoprecipitated with an anti-Myc antibody. The IP was conducted on cells untreated or exposed to the indicated drugs as reported in the Methods section. Input and immunoprecipitates were then analyzed by WB for the expression of the indicated proteins. B) Representative confocal IF images of an untreated or 2  $\mu$ M CPT exposed sample of BJ-hTERT fibroblast. The single staining for TRF2, SIRT6 and  $\gamma$ H2AX relative to the experiment showed in Figure 3D are reported. Scale bar 10  $\mu$ m. C) Western blot analysis of PAR polymer formation and SIRT6 levels in siGFP- or siSIRT6-transfected HCT116 cells untreated or exposed to 2  $\mu$ M CPT for 15 or 30 minutes. PAR levels were expressed in the histograms as fold changes in untreated versus CPT treated samples, after  $\beta$ -actin normalization. D) WB analysis of PARP1 levels in siGFP- or siPARP1-transfected BJ-hTERT cells in untreated or CPT-treated samples relative to the experiment showed in Figure 3B-C.

## Supplemental Figure 5

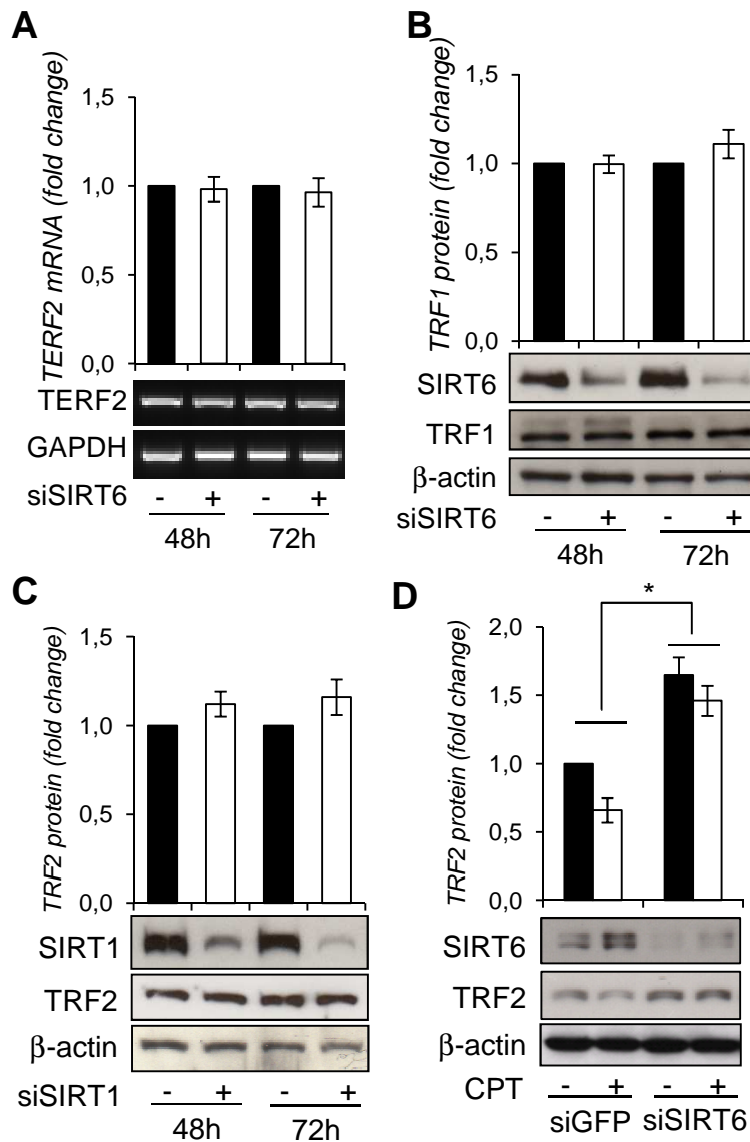

### Supplemental Figure 5. SIRT6 affects TRF2 protein stability

A) RT-PCR analysis of *TERF2* mRNA in siGFP- or siSIRT6-transfected HCT116 cells after 48 and 72 hours of siRNA delivery. *TERF2* mRNA expression levels were expressed in the histograms (upper panel) as fold changes in siSIRT6 versus siGFP samples, after GAPDH normalization. Picture on the lower panel shows the RT-PCR amplification products run on agarose gel. B) Western blot analysis of TRF1 and SIRT6 levels in siGFP- or siSIRT6-transfected HCT116 cells after 48 and 72 hours of siRNA delivery (bottom panel). TRF1 expression levels were expressed in the histograms (upper panel) as fold changes in siSIRT6 versus siGFP samples, after  $\beta$ -actin normalization. C) Western blot analysis of TRF2 and SIRT1 levels in siGFP- or siSIRT1-transfected HCT116 cells after 48 and 72 hours of siRNA delivery (bottom panel). TRF2 expression levels were expressed in the histograms (upper panel) as fold changes in siSIRT1 versus siGFP samples, after  $\beta$ -actin normalization. D) Western blot analysis of TRF2 and SIRT6 levels in siGFP- or siSIRT6-transfected HeLa cells after 6 hours by the end of 2  $\mu$ M CPT exposure (bottom panel). TRF2 expression levels were expressed in the histograms (upper panel) as fold changes in treated versus untreated samples, after  $\beta$ -actin normalization. All histograms show the mean values of three independent experiments. Bars indicate means  $\pm$  SD. \* =  $p < 0.05$ .

# Supplemental Figure 6

**A**

| Accession   | Score | Mass  | Matches | Match(sig) | Sequences | Seq(sig) | Description                                         |
|-------------|-------|-------|---------|------------|-----------|----------|-----------------------------------------------------|
| TERF2_HUMAN | 2297  | 59728 | 128     | 91         | 21        | 16       | Telomeric repeat-binding factor 2                   |
| EHD4_HUMAN  | 516   | 61365 | 28      | 18         | 12        | 9        | EH domain-containing protein 4                      |
| GNL3_HUMAN  | 500   | 62468 | 29      | 24         | 12        | 12       | Guanine nucleotide-binding protein-like 3           |
| RL1D1_HUMAN | 337   | 55167 | 17      | 13         | 9         | 7        | Ribosomal L1 domain-containing protein 1            |
| TCPD_HUMAN  | 289   | 58401 | 16      | 13         | 7         | 7        | T-complex protein 1 subunit delta                   |
| TCPG_HUMAN  | 246   | 61066 | 12      | 6          | 7         | 3        | T-complex protein 1 subunit gamma                   |
| RBM39_HUMAN | 173   | 59628 | 8       | 7          | 3         | 3        | RNA-binding protein 39                              |
| CPNE8_HUMAN | 172   | 63638 | 19      | 11         | 9         | 4        | Copine-8                                            |
| SGPL1_HUMAN | 160   | 64053 | 3       | 3          | 2         | 2        | Sphingosine-1-phosphate lyase 1                     |
| IF2B3_HUMAN | 144   | 64008 | 7       | 5          | 4         | 2        | Insulin-like growth factor 2 mRNA-binding protein 3 |
| RCC2_HUMAN  | 140   | 56790 | 10      | 7          | 7         | 5        | Protein RCC2                                        |
| PSMD3_HUMAN | 132   | 61054 | 7       | 4          | 4         | 2        | 26S proteasome non-ATPase regulatory subunit 3      |
| HNRPL_HUMAN | 127   | 64720 | 3       | 2          | 2         | 1        | Heterogeneous nuclear ribonucleoprotein L           |
| KPYM_HUMAN  | 126   | 58470 | 21      | 8          | 9         | 6        | Pyruvate kinase PKM                                 |
| EHD1_HUMAN  | 115   | 60646 | 8       | 4          | 4         | 2        | EH domain-containing protein 1                      |
| DJC11_HUMAN | 111   | 63524 | 7       | 4          | 5         | 3        | DnaJ homolog subfamily C member 11                  |
| NOP58_HUMAN | 108   | 60054 | 9       | 5          | 6         | 4        | Nucleolar protein 58                                |
| TCPZ_HUMAN  | 104   | 58444 | 9       | 6          | 4         | 4        | T-complex protein 1 subunit zeta                    |
| CPNE3_HUMAN | 102   | 60947 | 6       | 5          | 3         | 2        | Copine-3                                            |

**B**

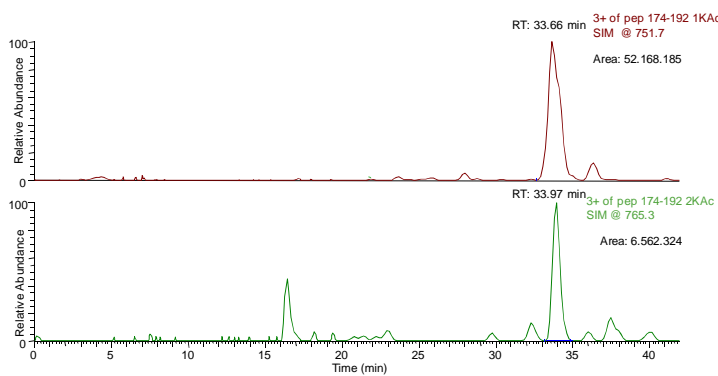

**C**

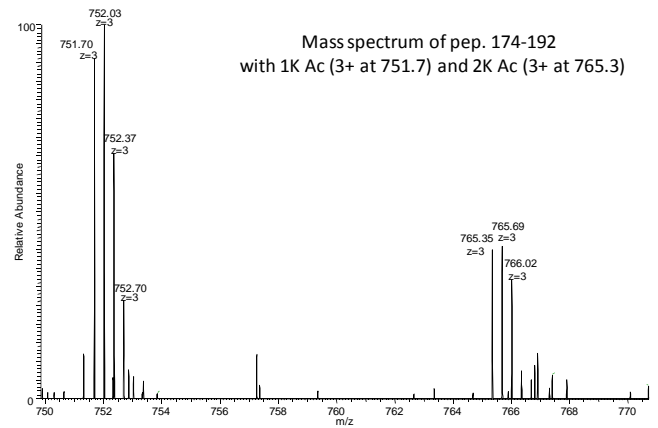

## Supplemental Figure 6. *In vivo* TRF2 acetylation pattern investigated by proteomic analysis.

A) Proteins identified in the gel band at 60 kDa by nano-LC-MSMS coupled to MASCOT bioinformatic analysis are shown. The Score represents the identification reliability; the Matches and the Match(sig) give the number of MS/MS spectra matched to a particular protein (the matched value can be misleading if the same peptide has been scanned multiple times), while the Sequences and Pep(sig) represent the number of amino acid sequences identified by experimental evidence. Data were filtered for the correct MW. B) Samples of LCMSMS traces relative to the pep. 174-192 +1KAc (red) and +2KAc (green); peak areas are also reported. C) Triply charged ions of both peptides.

## Supplemental Figure 7

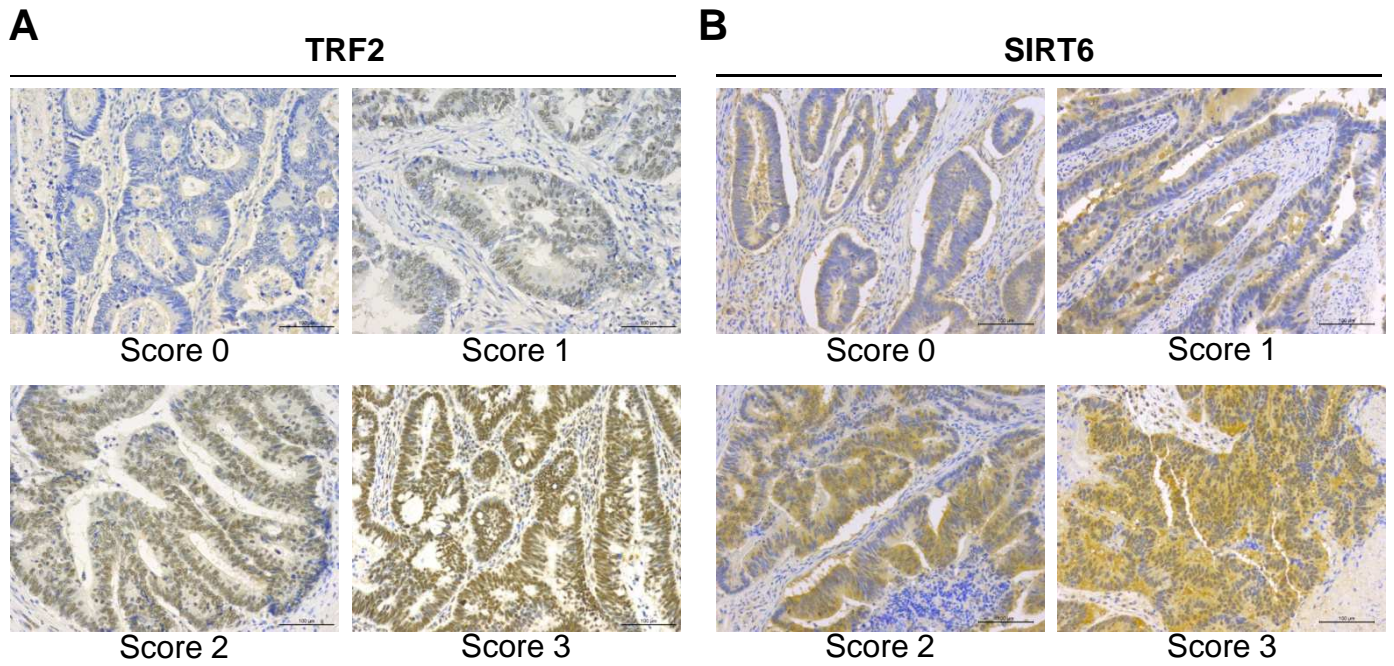

### Supplemental Figure 7. TRF2 and SIRT6 expression scores in IHC analysis of CRCs

Representative immunohistochemical staining of colon carcinomas showing TRF2 (A) and SIRT6 (B) expression score 0; 1+; 2+, 3+ respectively. Magnification 20X. Scale bar 100  $\mu$ m.

**Supplemental Table 1.**

**Biopathological characteristics of colon rectal cancer patients**

| <b>Total number of pts</b> | <b>185</b> |
|----------------------------|------------|
| <b>Tumor size</b>          |            |
| 1-2                        | 21 (11%)   |
| 3                          | 122 (66%)  |
| 4                          | 42 (23%)   |
| <b>Node</b>                |            |
| Negative                   | 86 (46%)   |
| Positive                   | 99 (54%)   |
| <b>Grading</b>             |            |
| 1-2                        | 153 (83%)  |
| 3                          | 32 (17%)   |
| <b>Stage</b>               |            |
| I-II                       | 73 (39%)   |
| III                        | 68 (37%)   |
| IV                         | 44 (24%)   |
| <b>TRF2 expression</b>     |            |
| 0                          | 35 (19%)   |
| 1+                         | 28 (15%)   |
| 2+                         | 69 (37%)   |
| 3+                         | 53 (29%)   |
| <b>SIRT6 expression</b>    |            |
| 0                          | 36 (19%)   |
| 1+                         | 63 (34%)   |
| 2+                         | 81 (44%)   |



**Supplemental Table 2.** Correlation between TRF2 and SIRT6 expression by IHC in stage I-IV colo- rectal cancer patients

|                            | <b>TRF2<br/>IHC score</b> |                     |            |
|----------------------------|---------------------------|---------------------|------------|
| <b>SIRT6<br/>IHC score</b> | <b>0/1+ (Low)</b>         | <b>2+/3+ (High)</b> | <b>TOT</b> |
| <b>0/1+ (Low)</b>          | 14 (14%)                  | 85 (86%)            | 99 (54%)   |
| <b>2+/3+ (High)</b>        | 49 (57%)                  | 37 (43%)            | 86 (46%)   |
| <b>TOT</b>                 | 63 (34%)                  | 122 (66%)           | <b>185</b> |

**P= <0.0001**
